# Supplementary material for: Three-dimensional NiCo2O4 nanowire arrays: preparation and storage behavior for flexible lithium-ion and sodium-ion batteries with improved electrochemical performance
Source: Royal Society of Chemistry journal article supplement (doi:10.1039/c5ta05931c), 2015-01-01
Supplement: c5ta05931c1.pdf [file c5ta05931c1.pdf]

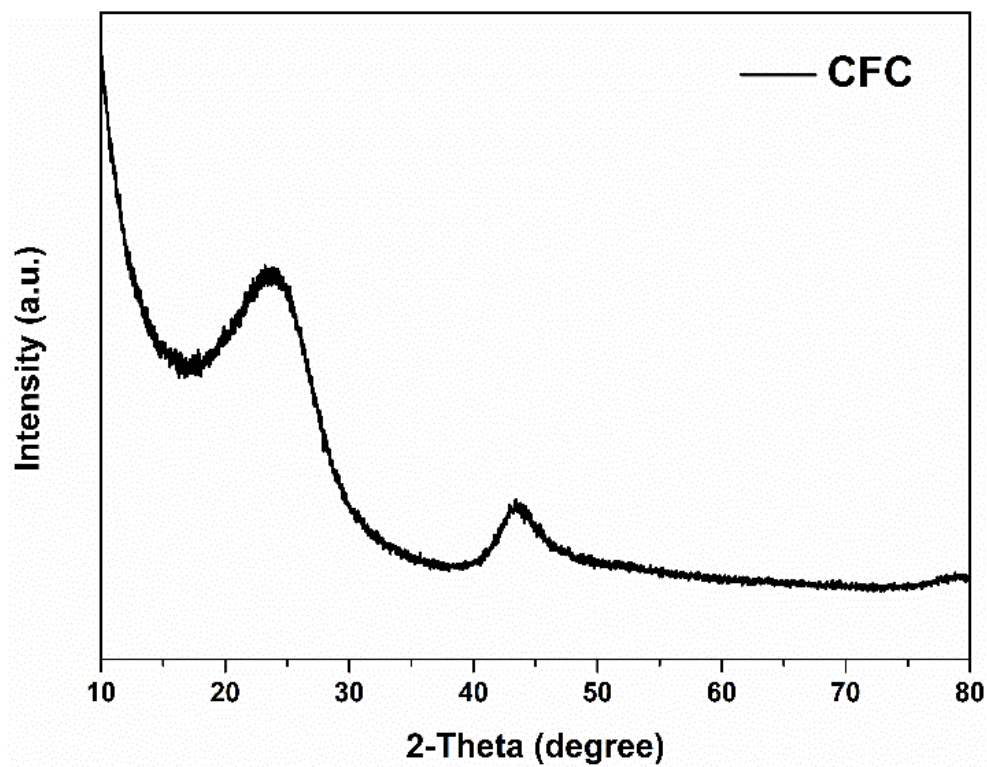

**Fig. S1** XRD spectra of the pure CFC.

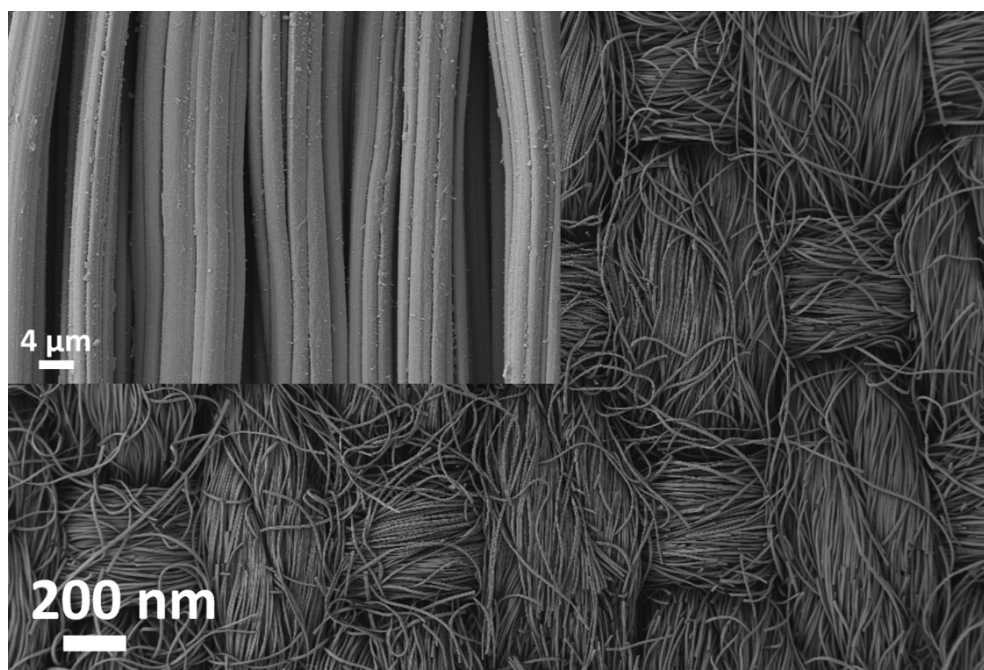

**Fig. S2** The SEM image of the pure CFC.

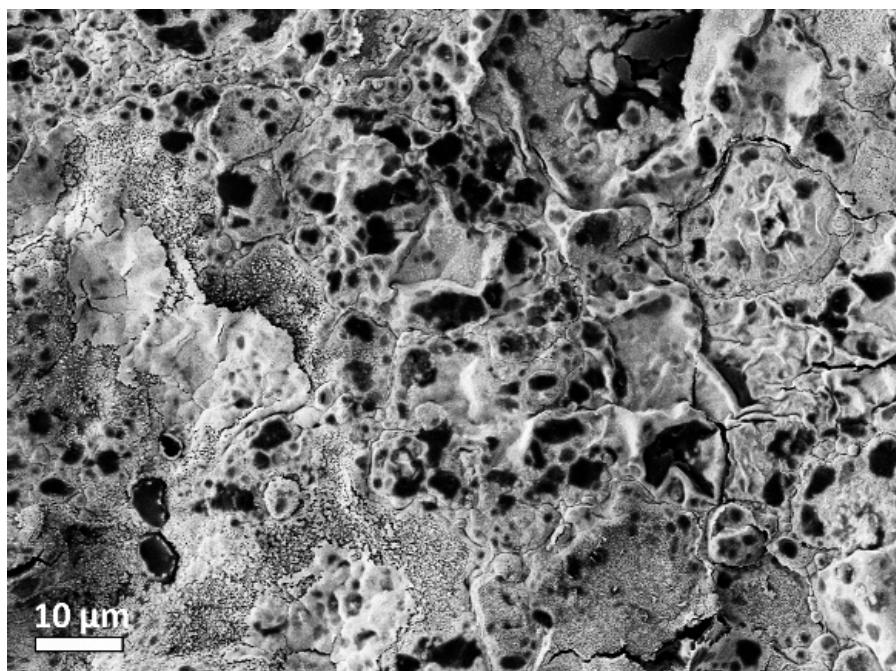

Fig. S3 The SEM image of the NCO powder as electrode materials for LIBs after 100 cycles.

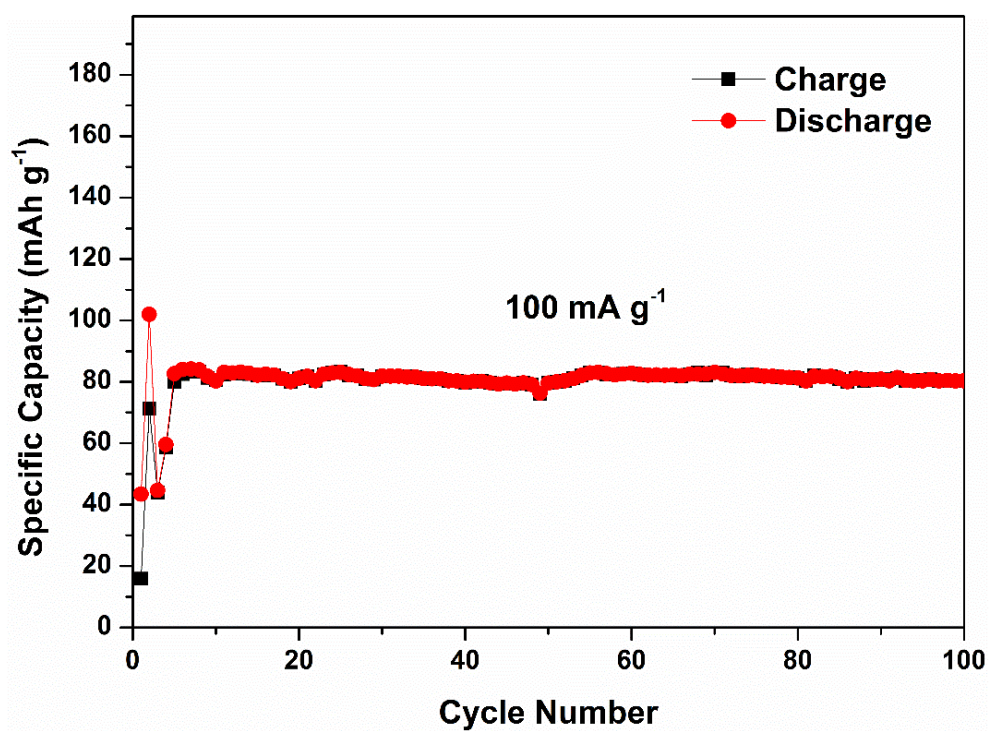

Fig. S4 Cycling performance of the pure CFC as electrode materials for LIBs at a current density of 100 mA g<sup>-1</sup>.

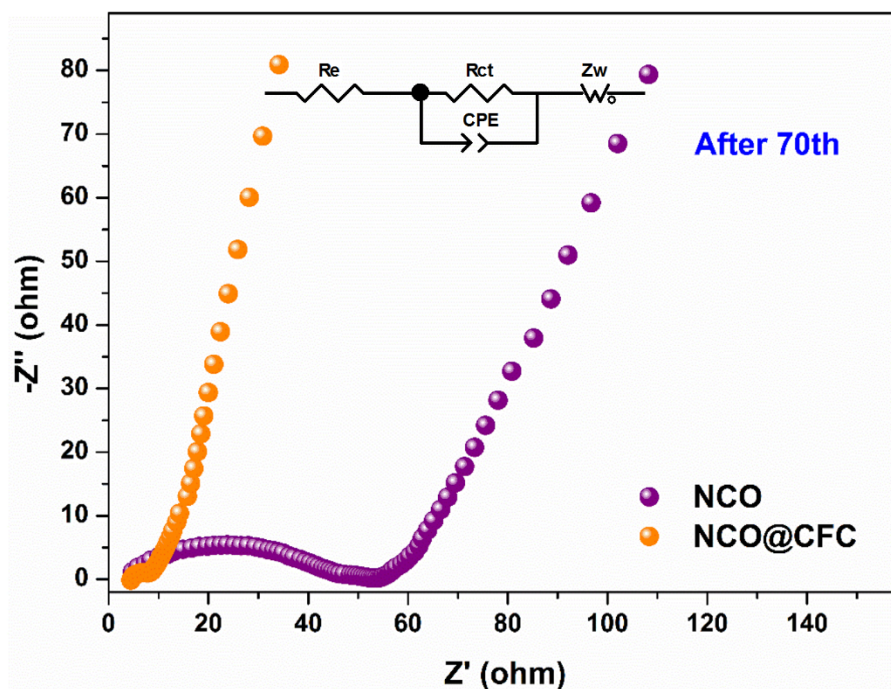

**Fig. S5** Electrochemical impedance spectra of the pure NCO electrode and NCO@CFC electrode after rate cycle in the frequency range from 100 KHz to 0.01 Hz. Inset shows the equivalent circuit.

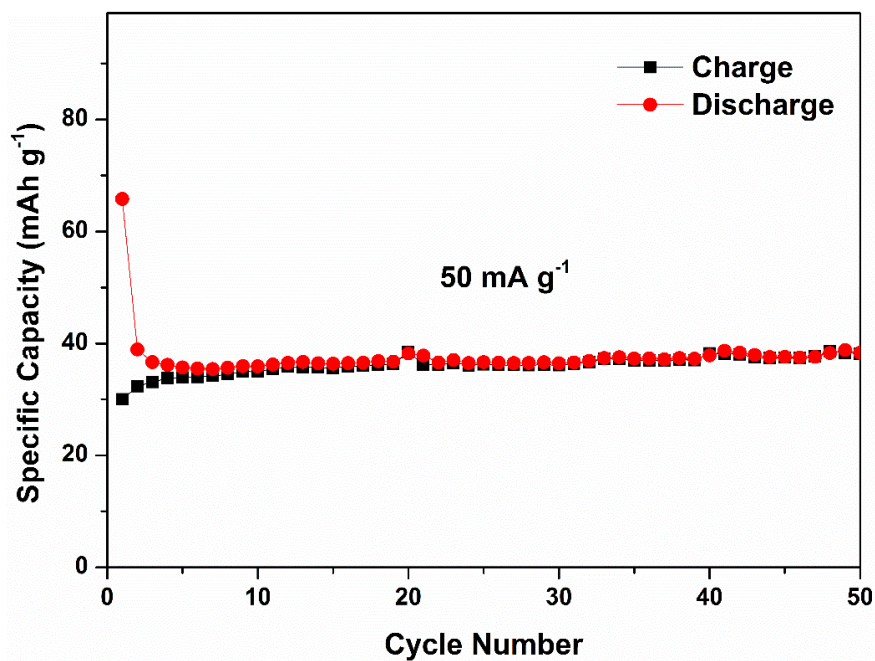

**Fig. S6** Cycling performance of the pure CFC as electrode materials for SIBs at a current density of  $50 \text{ mA g}^{-1}$ .
